# Supplementary material
Source: ML conference proceedings conference paper supplement (https://openaccess.thecvf.com/content/CVPR_2019/html/Kato_Learning_View_Priors_CVPR_2019_paper.html)
Supplement: Supplementary file 1 [file Kato_Learning_View_Priors_CVPR_2019_supplemental.zip]

Archive with 3 entries (2 files):
- supplementary_material_final/
- supplementary_material_final/results.html
- supplementary_material_final/appendix.pdf
