# Supplementary material
Source: ML conference proceedings conference paper supplement (https://openaccess.thecvf.com/content/CVPR_2019/html/Kato_Learning_View_Priors_CVPR_2019_paper.html)
Supplement: Supplementary file 1 [file Kato_Learning_View_Priors_CVPR_2019_supplemental.zip › supplementary_material_final/results.html]

Please visit project page for additional results.
